# Supplementary material for: A Systematic Review of Computational Drug Discovery, Development, and Repurposing for Ebola Virus Disease Treatment
Source: Molecules. 2017 Oct 20;22(10):1777. doi: 10.3390/molecules22101777 (PMC6151658; doi:10.3390/molecules22101777)
Supplement: Supplementary file 1 [file molecules-22-01777-s001.xlsx]

## Sheet: main
Title	Author, Year, Country	Prot/Gene Target	Protocol/Method/Pipeline	Methods Outline	Software/algo/param	Experiment: PDB ID / OTHER ID	Experiment: Compound / Biologic	Database	Relevant results	Result: Compound/Biologic	Non-comp methods in paper	Multitargeting	Notes
Molecular modeling, simulation and docking study of Ebola Virus glycoprotein	Ahmad et al., 2017, Pakistan	secreted glycoprotein	homology modeling, structure prediction, validation, molecular dynamics, docking	Structure prediction (prediction of secondary structures, intrinsic disorder prediction,) -> Homology modeling (retrieve template, target-template alignment) -> Dynamics and Docking (generate 3D model w/earlier model and MOE, MD, use final structure for docking)	PREDATOR, PHD, GOR4, DPM, HNN, DSC, SIMPA96, SOPM, RONN, GLOBPLOT, DisEMBL, MOE, RAMPAGE, ERRATE, Expasy-ProtoParam, MUSCLE server, PSI-BLAST	Uniprot:Q7T9EO	dronedarone, amiodarone, and respective derivatives	Uniprot, PDB	Max dronedarone derivative interaction: “1D”, docking score of -19.89 (Kcal/mol), binding affinity score of 17.65 (pKi), 5 interactions. Max amiodarone derivative interaction: “2A”, docking score of -18.79, binding affinity 16.95, 4 interactions.	dronedarone 1D, amiodarone 2A, other derivatives also showed potentially strong interactions	No	No	The authors study the three dimensional structures of the viral protein (secreted and envelope glycoprotein) using homology modeling, energy minimization, validation, molecular dynamics, and docking. At the time of writing, the authors claimed that they could not find a crystal structure of their desired target. The targets were predicted to interact with dronedarone and amidarone derivatives.
Homology modeling and docking studies of VP24 protein of Ebola virus with Oseltamivir and its derivatives	Sharma et al., 2017, India	VP24	homology modeling, structure prediction, energy minimization, validation, docking	Bioinformatics Analysis (sequence retrieval, sequence alignment, template selection) -> Homology Modeling (compare templates, generate models, energy minimize, Ramachandran plot assessment) -> Docking (compound selected by Lipinski’s Rule of Five, derivatives selected as well) -> Post Docking Visualization -> Residue interaction assessment	Phyre2, EasyModeller4, RAMPAGE, BLASTP, YASARA, Schrodinger Suite, GLIDE, Autodock, Discovery Studio Visualizer	ALG02124.1 (Genbank)	oseltamivir and derivatives (top 20 reported in paper)	Drugbank (Oseltamivir), ZINC (Derivatives), NCBI-Genbank	oseltamivir [-5.8 kcal/mol], Zinc_77312077 [-5.7 kcal/mol], Zinc_77287101 [-5.8 kcal/mol], Zinc_77287100 [-5.9 kcal/mol], Zinc_77287098 [-6.1 kcal/mol], Zinc_77287096 [-6.0 kcal/mol], Zinc_77286930 [-5.8 kcal/mol], Zinc_77286925 [-6.1 kcal/mol], Zinc_65748305 [-5.9 kcal/mol], Zinc_36451498 [-6.0 kcal/mol], Zinc_11592802 [-6.0 kcal/mol], Zinc_6777830 [-5.9 kcal/mol], Zinc_6777829 [-5.8 kcal/mol], …	Zinc_77287098	No	No	The authors examine, in-virtuale, the interaction between VP24 and oseltamivir aka Tamiflu (and derivatives) using homology modeling, structure prediction, energy minimization, bioinformatic validation, and molecular docking. Although the range of docking scores was relatively narrow there was a wider variety of predicted amino acid interactions.
Pharmaco-Informatics: Homology Modeling of the Target Protein (GP1,2) for Ebola Hemorrhagic Fever and Predicting an Ayurvedic Remediation of the Disease	Bagchi et al., 2009, India	surface/envelope glycoprotein	homology modeling, structure prediction, validation, docking	Homology Modeling / Structure prediction -> Validation -> bespoke in silico compound structure generation -> docking	MODELLER, Swiss-PDBViewer, ACD/ChemSketch, RAMPAGE, ArgusLab 4.0.1, HEX_SERVER, HHpred, BLAST	Uniprot:Q7T9D9, PDBs for homology modeling: 2EBOA, 2RLJA, 3CSYA	andrographolide	Uniprot / NCBI-Entrez, PDB, structures built with Modeller, ChemSketch, and ArgusLab	The authors docked andrographolide to five predicted models of the protein and found that the highest predicted binding was model 4.	andrographolide	No	No	The authors demonstrate the use of homology modeling, docking, and other bioinformatic tools. They report that the compound andrographolide docked to one of their predicted protein structures and that they conclude that the compound can potentially be a treatment for EBOV.
In silico derived small molecules bind the filovirus VP35 protein and inhibit its polymerase co-factor activity	Brown et al., 2014, USA	VP35	docking, energy minimization, ranking and interaction fingerprint comparison, [medicinal chemistry: crystallography, compound synthesis, NMR spectroscopy, structural study, NP pulldown assay, mini genome study, EBOV assays	Initial in-silico screen from ZINC DB -> energy minimization and scoring -> docking and visual inspection -> in-silico lead assessment -> medicinal chemistry / structural biology -> optimization and assessment -> medicinal chemistry (structural studies, assays)	Autodock 4.0 (DOVIS PIPELINE), CHARMM35b2 (MMFF), LigScore2, REFMACS, Phenix, PRODRG2, Coot, MolProbity, GraphPad Prism	PDB:3FKE (In-silico screening portion) [small molecule - VP35 complexes derived in experiment, PDBs: 4IBB (GA017), 4IBC (GA246), 4IBD (VPL27), 4IBE (VPL29), 4IBF (VPL42), 4IBG (VPL48), 4IBH (VPL51), 4IBI (VPL57), 4IBJ (VPL58), 4IBK (VPL60)	5.4 million ZINC DB compounds in initial screening set. Set narrowed down in multistage assessment process for in-vitro experiments.	ZINC, PDB	Most notably, compound structure similar to GA017 (small mol in complex PDB:4IBB) inhibits VP35 at the interferon inihibitory domain, also identified multiple druggable regions with various other compounds on VP35, produced several high resolution complexes of small-molecules and VP35 (these were submitted to the PDB, note that some other studies in this analysis also use these structures from Br…	"GA series molecules", optimized lead compounds (VPL): GA017, GA248, VPL-42, VPL-57, GA17, GA240, VPL-60, VPL-51, VPL-58, VPL-15, GA248 [Note that these are the small molecules in complex with VP35 in the authors' PDB submissions]	Yes	No	The authors undertake an extensive in-virtuale and in-vitro investigation of small molecule interaction and inhibitory potential with VP35. An initial in-silico screening was used to predict potential lead compounds. The screening consisted of a docking simulation between 5.4 million ZINC compounds and PDB:3FKE. Energy minimization was performed on the top 20,000 ranking subset complexes. These m…
Virtual screen for repurposing approved and experimental drugs for candidate inhibitors of EBOLA virus infection	Veljkovic et al., 2015, Serbia, France, USA, Canada	N/A	Library curation / data mining, Compound virtual screening (electron-ion interaction potential / average quasi valence number)	Library curation: candidate set (select approved and experimental drugs from DrugBank), training set (screen a subset of potential inhibitors from set of FDA approved drugs), control set (~45 million compounds from PubChem and 49 inhibitors obtained via data mining PubMed literature, FreePatentOnline Browser) -> Conduct virtual screen based on assessing the EIIP and AQVN parameters and develop cr…	Software undisclosed, showed equations for AQVN and EIIP and explained high level process, secondary goal of this paper was to establish a webserver for this type of study, "ebola screen" web server (http://www.biomedconsulting.info/ebolascreen.php)	N/A	6438 drugs from DrugBank (screening set), 152 drugs (learning set, in vitro, in vivo inhibition screen of 3828 FDA drugs), 45,010,644 compounds (control set, PubChem)	DrugBank, PubMed, FreeOnlinePatent Browser, PubChem	Selected 267 approved and 382 experimental drugs as candidates for treatment of EVD (Notable: antimalarial, antibiotics (macrolides, pleuromutilins , aminoglycosides)). In the Ebola Virus Infection Inhibitors Space (AQVN 2.36, EIIP 0.0912-0.0924): 79% of FDA compounds were found, 95.9% of the experimentally predicted compounds were found, and 6.5% of PubChem compounds were found. The authors conc…	Selected 267 approved and 382 experimental drugs as candidates for treatment of EVD (Notable: antimalarial, antibiotics (macrolides, pleuromutilins , aminoglycosides))	No	N/A	Use of molecular descriptors AQVN and EIIP to establish an “Ebola Virus Infection Inhibitor Space” built using parameters learned from an Ebola virus in vitro drug screen and testing using another in vitro screen
Molecular docking based screening of predicted potential inhibitors for VP40 from Ebola virus	Abazari et al., 2015, Iran	VP40	dynamics, docking, pharmacokinetic analysis	dynamics simulation of protein environment -> docking - > ADMET (absorption, distribution, metabolism, excretion, toxicity) analysis	GROMACS 4.5.4, PyRx / AutoDock Vina, FAFDrugs3, admetSAR, PROTOX	PDB:4LDB	120,000 ZINC DB compounds	ZINC, PDB	Top 10 compounds binding affinity range -11.1 to -8.2 kcal/mol, reported the corresponding ADMET properties and structural characteristics	10 unlabeled, 4 selected as top candidates	No	No	The authors simulate the environment of a VP40 structure, screen thousands of compounds, undertake docking and pharmacokenetic simulations, and present 10 predicted compounds with their docking scores and pharmacokentic properties.
Inhibition of Ebola Virus by anti-Ebola miRNAs in silico	Golkar et al., 2015, Denmark, USA	4 EBOV genomes	Sequence alignment, other algorithms to predict miRNA - EBOV RNA inhibitory activity / post-transcriptional silencing	Methods described in a cited paper	Software described in a cited paper	NCBI EBOV sequences: KJ660346.2; NC_004161.1; NC_006432.1; NC_014372.1	hsa-miR sequences	miRBase, NCBI	miR-607 had capacity to inhibit all four major EBVs; hsa-miR-5699-5p targets Ebola-GP; hsa-miR-4682 targets VP35; hsa-miR-4692 and hsa-miR -548-az target VP40; hsa-miR -4526 targets NP; hsa-miR -3065-5p targets VP24 hsa-miR -145-3p targets trailer portion; hsa-miR-491-3p , hsa-miR -4633-3p, hsa-miR-491-3p , hsa-miR-548-3p target L (polymerase); 32 total predicted to exhibit significant inhibitory…	miR-607, hsa-miR-5699-5p, hsa-miR-4682, hsa-miR-4692, hsa-miR-548az, hsa-miR-4526, hsa-miR-3065-5p, hsa-miR-145-3p, hsa-miR-491-3p , hsa-miR-4633-3p, hsa-miR-491-3p , hsa-miR-548-3p	No	No	miRNA as intracellular viral defense, prevent replication, sought miRNA with high identity / homology, show that these bind to specific key Ebola genes. Found 71 miRNAs over 80% identity. Identified 32 miRNAs that exhibit inhibitory nature to block EBV strains. miR-607 had capacity to inhibit all four major EBVs
In silico study of VP35 inhibitors: from computational alanine scanning to essential dynamics	Dapiaggi et al., 2015, Italy	VP35	Molecular dynamics, computational alanine scanning, RMSD fluctuations, bootstrap/PCA	molecular dynamics of protein complexes -> computational alanine screening snapshots of last 5ns of each dynamics simulation -> bootstrap root mean-square fluctuations analysis -> essential dynamics	GROMACS (AMBER99SB-ILDN, Generalized Amber Force Field, TIP3P, LINCS algorithm, velocity rescale algorithm, Berendsen barostat, Particles Mesh Ewald algorithm), "(MM/PBSA, APBS), GROMACS_utility (g_covar, g_anaeig), VMD, Naccess	PDBs: 4IBB, 4IBC, 4IBD, 4IBE, 4IBF, 4IBG, 4IBI, 4IBJ, 4IBK, 3FKE, 4GH9	GA017, GA246, VPL27, VPL29, VPL42, VPL48, VPL57, VPL58, VPL60	PDB	The authors predict critical residues for protein-ligand interaction and characterize the dynamics of the complezes. They posit that resides: Lys222, Arg225, Gln224, Lys248, Lys251, Ile295 are critical for complex interaction through computational alanine scanning, across several ligands. Some of the results appear to concur with experimental evidence, notably from Brown et al: mutating Lys248 an…	Explored the effects of GA017, GA246, VPL27, VPL29, VPL42, VPL48, VPL57, VPL58, VPL60 on certain residues.	No	No	Expands on previous experimental results (id residues critical to ligand interaction, ligand presence modifies dynamics of overall protein and specific segment). Dapiaggi et al, in their paper "In silico study of VP35 inhibitors: from computational alanine scanning to essential dynamics" undertook a computational investigation of VP35 to study the energetics and dynamics of its ligand interaction…
Small-molecule probes targeting the viral PPxY-host Nedd4 interface block egress of a broad range of RNA viruses	Han et al., 2014, USA	VP40, VP40(L-domain), other viral proteins	in-vitro methods, docking, energy minimization, ranking, substructure similarity searching, statistical analysis (ANOVA), testing in-vitro	in-vitro curation and testing (cell lines, viruses, antibodies; test compounds; plasmids; assays; viral budding and titration) -> SAR analysis (docking, energy minimization) -> in-vitro compound evaluation (VLP budding assay, cytotoxicity) -> in-vitro compound evaluation (Assays, assays) -> …	Autodock 4.0, CHARMM (MMFF), Accelrys LigScore2	? - No PDB ID stated explicitly (PPxY motif and the host WW domain of Nedd4), possibly PDB:2N8U? -- can't find the other. (An article was cited which published this to the PDB).	4.8 million compounds used in structure activity relationship screening (in-virtuale)	ZINC, PDB	Compounds 4 and 5 are predicted to cause antibudding activity against Ebola virus like particls (and Lassa fever VLPs as well as activity against vesicular stomatitis and rabies viruses). The authors conclude that this type of interaction can lead to the development of a broader class of antivirals to be used against viruses that depend on this type of PPxY L domain activity and perhaps against R…	candidate compounds '4' (Amb123203) and '5' (Amb21795397)	Yes	No*	Only 1 Ebola protein, but other viral proteins considered
In silico and in vitro methods to identify ebola virus VP35-dsRNA inhibitors	Glanzer et al., 2016, USA	VP35	docking, alignment, in vitro testing, compound property analysis, residue analysis	Iterative multistage docking, in-vitro screening: dock vp35 with 80,000 -> compound selection -> [in vitro] assays -> -> superimpose 26 vp35 structures -> residue analysis / flexiblity search -> -> repeat docking w/flexible residues -> comound selection [in vitro] testing	Molegro Docking, Molinspiration Property Calculation Service, Molegro Structure Protein Alignment, UCSF CHIMERA	PDBs: 3FKE, 3L25, 3L26, 4IBB, 4IBC, 4IBD, 4IBE, 4IBF, 4IBG, 4IBI, 4IBK	80,000 compound library	ZINC, RCSB PDB	In an interative multistage in-silico/in-vitro study, the authors investigate the potential of VP35 compound inhibition by interrogating the ZINC database. In their in-silico portion of the experiment, the authors selected 25 compounds out of a courpus of around 80,000 (narrowed down from 5.4 million earlier.) They tested these compounds in the in-vitro portion of their experiment. They found tha…	ZINC_05328460 (highest confidence prediction).	Yes	No	Combined in silico and in vivo experiment to find VP35 inhibitors via multi-stage molecular docking screening, structural alignment, residue identification, and purification / assay assessments.
Virtual screening of inhibitors targeting at the viral protein 40 of Ebola virus	Karthick et al., 2016, (Hong Kong) China	VP40	energy minimization, virtual screening, docking, intermolecular interaction analysis, dynamics, ADME, drug likeness analysis, toxcity prediction	pre-virtual screening (energy minimization) -> virtual screening (ranking of potential lead candidates for the receptor) -> docking -> intermolecular interaction analysis -> molecular dynamics of complexes -> ADME / drug likeness / toxicity prediction	GROMACS (GROMOS43a1), iScreen (PLANTS), Autodock 4.2.6, Autodock Tools, AutoGrid, PEARLS, PDBsum, UCSF Chimera, GROMACS (GROMOS43a1, SPC water model), PRODRG (EWALD Algorithm, Lincs Algorithm), GROMACS UTIL (g_rms, g_hbond), Molsoft, Osiris Property Explorer, Protox Web Server, PROCHECK	PDB:1H2C	200 compounds from the Traditional Chinese Medicine Database (TCMD)	RCSB PDB, Traditional Chinese Medicine Database	The authors report that emodin-8-beta-D-glucoside and tonkinochromane_G are the lead candidates of those that they surveyed for potential anti-viral activity against EBOV. Furthermore, they find that these compounds interact with R-134 and F-125 which are important for RNA binding. Molecular dynamics simulations supported their earlier finding in the docking simulation. Based on toxicity and othe…	(Top compounds authors focused on): emodin-8-beta-D-glucoside, tonkinochromane_G |||||| (other candidates, (supplementary files)): neoglucobrassicin; glisoflavanone; rosmarinic_acid_ethyl_ester; 2-[(6Z.9Z_12Z)-heptadeca-6_9_12-trienyI]-6-hydroxybenzoic_acid; chrysophanol-8-beta-D-glucoside; 3_4-dihydro-3-methoxypaederoside; Melittoside; beta-methoxylforsythoside; glucobrassicin; manninotriose; D-…	No	No	The authors construct a protocol to test potential candidate compounds as inhibitors to EBOV VP40. They selected the Traditional Chinese Medicine Database as their compound source and the RCSD PDB to find their crystal structure 1H2C. The protocol consisted of 7 phases: pre-virtual screening (energy minimization), virtual screening, molecular docking, intermolecular interaction analysis, dynamics…
Integrated computational approach for virtual hit identification against Ebola viral proteins VP35 and VP40	Mirza et al., 2016, Pakistan, Belgium	VP35, VP40	binding site prediction, drug similarity analysis, pharmacokinetics, pharmacodynamics, energy minimization, metabolic site prediction, docking, validation	screen compound library (similarity, lipinski's Ro5, duplicate deletion, pharmacokinetics filters) -> energy minimization of ligands -> protein prep (removal of water molecules, co-crystallized entities, energy minimization) -> docking -> post-processing-> ADME/toxicity filters -> metabolic site prediction -> aggregator filter -> safety profiling -> PAINS filter -> Visual analysis	OpenBabel, Discovery Studio, UCSF Chimera (AMBER ff12SB force field for protein energy minimization), CASTP, MUSCLE, Jalview 2.7, BLAST (PSI-BLAST), ALIGN2D, MODELLER 9.12, CHARMM22, Autodock Vina, Mcule-pipeline, PyMol, DrugScore eXtended, DUD-e, Daylight, NSCC 11, Molinspiration, OSIRIS, ADMET prediction suite (ACD/LABS), Molsoft, AdmetSAR, Aggregator Advisor, MetaPrint2D, clustalX, ligPlots	PDB: 4IBB, 4IBC, 4IBD, 4IBE, 4IBF, 4IBG, 4IBI, 4IBJ, 4IBK	45,013 compounds [145,329 before filtering]	RCSB PDB, OTAVA chemicals, PubChem, Analyticon Discovery, Timtec, Indofine Chemical company, Selleck natural product library	Binding energies with these predicted drugs ranged from -9.2 to -7.4 kcal/mol for VP35 and -7.2 to -6.4 kcal/mol for VP40. The top 3 for ___ are and ….	Timtec-ST45161107, Otava_7118230235, Timtec-ST50912611, Timtec-ST50616170, Analyticon-NP-010155, Otava-0115540195, Analyticon-NP-019744 (Kihadarnin A), Analyticon-NP-0005474, PubChem-CID17597017, Analyticon-NP-000375 (Lactupicrin), Analyticon_NP-014205 (Parfumine), Analyticon-NP-014522, Analyticon-003228 (Isorutarin)	No	Yes	The authors describe a pipeline for inhibition prediction for large compound libraries. There are several filtering stages in this pipeline that narrow the search space. The library is refined to reduce redundancy, assess pharmacokenetics/dynameics / ADMET, binding energy, safety profiles, etc. The pipeline narrows down the library from 120K to 13 predictions for the two proteins investigated in …
Drug repurposing to target Ebola virus replication and virulence using structural systems pharmacology	Zhao et al., 2016, USA	RNA-directed RNA polymerase (L) and VP24	binding site prediction, proteome wide binding site comparison, homology modeling, docking, molecular dynamics	homology modeling, proteome-scale ligand binding site comparison, protein-ligand docking, molecular dynamics	Verify3D, PROCHECK, SMAP, Modeller v9.14, I-TASSER, Autodock4, Autodock Vina, PLANTS, Surflex, AutoDockTools 4, CASTp, Xleap, ACEMD (AMBER99SB, SHAKE algorithm), Pymol, Ligplot +	PDB-VP24:4M0Q, (RNA Polymerase via homology modelling, template PDB-ID:4N49)	[2025 total drugs] 1766 FDA approved drugs, 259 experimental drugs	RCSB PDB, ZINC, FDA DrugBank	Drug classes of top hits: HIV protease inhibitor, antifungal, anti-viral. Top drugs VP24: Indinavir. Top drugs RNA Polymerase: Sinefungin, Maraviroc, Abacavir, Telbivudine, Cidofovir	Indinavir, Sinefungin, Maraviroc, Abacavir, Telbivudine, Cidofovir, Montelukast, Iloprost, hSalmeterol Xinafoate, Travoprost, Latanoprost, Remikiren, Vitamin K1, Mitoxantrone, Labetalol hydrochloride, Tafluprost, Misoprostol, Carboprost, Fosinopril, Benzylpenicilloyl Polylysine, Bimatoprost, Nebivolol, valrubicin, Tamsulosin, Mycophenolate Mofetil, SAM, aza-Sadenosyl-Lmethionine, A9145C, Maraviro…	No	Yes
Combating Ebola with Repurposed Therapeutics using the CANDO platform	Chopra et al, 2016, USA	Known proteins encoded by multiple EBOV genomes (Zaire, Sudan, Tai, Bundibugyo, Reston)	Binding site prediction, docking, interaction signature ranking similarity	Binding site prediction -> docking (via CANDOCK) -> benchmarking (via CANBENCH protocol)	COFACTOR, CANDOCK, ITASSER (HHBLITS, LOMETS, SPICKER, ModRefiner, KobaMin, et al.), ChemAxon MarvinBeans molconverter v.5.11.3, Xemistry Cactvs Chemoinformatics Toolkit, CANDO	PDB-GP2:1EBO membrane-fusion-subunit-from-envelope-glycoprotein; (other PDB-IDs not listed explicity in paper). Other targets (uniprot short names): GP2-envelope-glycoprotein; VP35-polymerase-cofactor-vp35; pre-sGP pre-small secreted glycoprotein; sGP-secreted glycoprotein; SeGP=super small secreted glycoprotein; VP24 - membrane associated protein	3733 FDA approved drugs	RCSB PDB, DrugBank, NCGC Pharmaceutical Collection, Wikipedia, PubChem	Top compounds predicted by CANDO: enfuvirtide, vancomycin, bleomycin, octreotide, lanreotide, somatostatin, ubidecarenone, unoprostone. 22 CANDO drug repurposing predictions that overlap with another study [Kouznetsova et al.], 10 of which are high scoring predictions. 24 compounds that overlap between CANDO and FDA approved drugs reported by [Johansen et al.], 11 of which were high scoring inter…	Common to all three studies: Niclosamide, Sertraline, Clomifene, Mebendazole, Deslanoside, Digoxin, Raloxifene, Clemastine, Tamoxifen	No	Yes	In common with [Johansen et al.]: five with affinity to H1 histamine receptor, 6 hormonal receptor modulators (4 estrogen, 1 androgen, 1 glucocorticoid), 1 serotonin receptor inhibitor, 1 dopamine receptor agonist, two sodium-potassium transmembrane transport, 2 that act during cell division to disrupt tubulin structure...........
Flavonoids as multi-target inhibitors for proteins associated with Ebola virus: in silico discovery using virtual screening and molecular docking studies	Raj et al., 2015, India	VP40, VP35, VP30, VP24	energy minimization, binding site prediction, docking, active site residue interaction analysis, ADMET analysis	Prep proteins: (water mols and heteromols removed, hydrogen added, geometry corrected, H-bonds optimized, energy minimization) -> Active site prediction -> Grid preparation -> prep compounds and assess properties (2D->3D, geometry minimization, ADME, Lipinski's rule of five) -> docking (3 stage glide based strategy: high throughput, standard precision, extra precision) -> ranking (e-model: Glide …	protein preparation wizard, SiteMap, GLIDE (Receptor Grid Generation Panel), QikProp v3.9	PDB-VP40:1H2C, PDB-VP35:3FKE, PDB-VP30:2I8B, PDB-VP24:4M0Q	4500 flavinoids	RCSB PDB, TimTec	Of the top ranking flavinoids docked to these EBOV targets, Gossypetin (ST059622) and Toxifolin (ST060285), had better docking scores and binding energies compared to a drug in development BCX4430 . All of which were predicted by the authors to be effective against all receptors. Some of the top ranked compounds had varying specificity to certain receptors: ST5090319 (only specific to VP40), ST50…	Gossypetin and Toxifolin (top 2). Results suggest that other flavinoids may also have inhibitory effects on EBOV: BCX4430, ST50903219, ST50940361, ST101866, ST078351.	No	Yes
Machine learning models identify molecules active against the Ebola virus in vitro	Ekins et al., 2016, USA	EBOV (non-specific targeting of protein)	Viral pseudotype entry assay and EBOV replication assay, prepare assay data and train machine learning models (Bayesian, SVM, Recursive Partitioning forest, single tree) models, validate, virtual screen, in-vitro testing	Initial assays and preparation for training data -> Bayesian, SVM, Recursive Partitioning tree, single tree models: (molecular function class fingerprints of max. diameter 6, AlogP, molecular weight, # rotatable bonds, # rings, # aromatic rings, # H-bond acceptors, # H-bond donors, mol. Fractional polar surface area) -> five fold validation -> pharmacophore mapping -> in vitro testing (assays)	Discovery studio, Mobile Molecular Data Sheet, R (programming language), other software described in citation	N/A (data from in-vitro portion of experiment.)	868 compounds used in the training set (other publication), 2320 compounds in MicroSource set	MicroSource	Pyronaridine, Quinacrine, and Tilorone predicted to be strong candidates. Of the machine learning models, the Bayesian approach performed the best for the EBOV replication, equivalent	quinacrine (EC50 350nM), pyronaridine (EC50 420nM), tilorone (EC50 230nM)	Yes	No*	Ekins et al, generated machine learning models based on high throughput screening data. They used these models to virtually screen compound libraries. Of the highest scoring molecules, they tested quinacrine, pyronaridine, and tilorone in vitro. The results suggest that compound sets of fewer than 1000 molecules can produce validated ML models which can be used to find new EBOV inhibitors.
Molecular docking based screening of compounds against VP40 from Ebola virus	El-Din et al, 2016., Egypt	VP40	fingerprint comparison, compound modeling, energy minimization, docking, pharmacokenetics	create compound library (similarity fingerprinting: 0.5 tanimoto score w.r.t. pyrimidine-2,4-dione), molecular docking (prepare target protein by removing ligands and energy min, search space region around Arg 134, add hydrogens / Kollman charges), RMSD clustering, post docking analysis (Lipinski Rule of Five, LD-50, ADME)	Chem Sketch, Swiss PDB Viewer, Autodock4 , Auto Grid, Auto Dock hydrogen module, UCSF Chimera, PROTOX, Molsoft	PDB:3TCQ	Starting-compounds: 1800 compounds similar to pyrimidine-2,4-dione	RCSB-PDB, PubChem	Top 7 compounds predicted binding energy between -5.21 kcal/mol and -4.08 kcal mol. The authors find these drugs to share favorable ADMET properties and note that they may demonstrate hydrogen bonding with Arg 134 of EBOV VP40.	CID:416724, CID:374108, CID: 3851453, CID: 256623, CID:44149862, CID:254616, CID:3183	No	No	CID:416724 (-4.48 kcal/mol, LR5 Y, drug likeness 0.83, probability of + Ames 0.03, oral bioavail. <30%, max. passive absorb 1%, LD50 16877 mg/kg, GHS tox. Class 6); CID:374108 (-4.36 kcal/mol, LR5 Y, drug likeness -0.05, probability of + Ames 0.11, oral bioavail. 30-, max. passive absorb 32%, LD50 15000 mg/kg, GHS tox. Class 6) CID:3851453 (-4.08 kcal/mol, LR5 Y, drug likeness -0.17, probability …
A common feature pharmacophore for FDA-approved drugs inhibiting the Ebola virus	Ekins et al., 2014, USA	VP35	pharmacophore modeling, docking	Common features pharmacophore, receptor-ligand pharmacophore, pharmacophore database search, docking of selected molecules to VP35, minimization, visualization	Discovery Studio 4.1 (CAESAR, FAST conformer generation, LibDock), CHARMM	PDBs: 4IBB, 4IBC, 4IBD, 4IBE, 4IBF, 4IBG, 4IBI, 4IBJ, 4IBK	chloroquine; amodiaquine; clomiphene; toremifene	RCSB PDB , Microsource Spectrum Database, CDD FDA Drugs Dataset	Ekins et al. in "A common feature pharmacophore for FDA-approved drugs inhibiting the Ebola virus" build pharmacophore models to explore the potential for VP35 targeting / inhibition by four drugs (the antimalarials: amodiaquine and chloroquine; and the selective estrogen receptor modulators clomiphene and toremifine. Based on prior independent research, the authors hypothesized that the four com…	model suggests that two classes of drugs (selective estrogen receptor modulators and anti-malarials) share common features in targeting VP35.	No	No (Multiple models, one protein)	explore potential for VP35 targeting / inhibition by four drugs of two distinct types (anti-malarials and selective estrogen receptor modulators).Selected compound s based on prior independe nt research that included in vitro and in vivo testing. Pharmacophor e models predicted common and similar hydrophobic regions and hydrogen bond acceptors, docked to representative VP35 structure. The anti-ma…
Pharmacophore based virtual screening and molecular docking studies of inherited compounds against Ebola virus receptor proteins	Shah, et al., 2015, India	VP24, VP35, VP40	pharmacophore modeling, docking	Preparation of proteins (water molecules removed, energy minimization of structures, visualization) -> active site prediction -> grid box preparation -> compound collection (enumeration of compounds and analogues, geometry minimization) -> pharmacophore based virtual screening -> molecular docking -> ADMET properties predicted by Molinspiration	Discovery Studio Visualizer 4.0, Swiss PDB viewer, Chimera, CastP server, AutoDock Vina 4.2, GEMDOCK, Molinspiration	PDBs: 1H2D, 3FKE, 4M0Q	56 compounds from the Kouznetsova study, and 256 chemical analogues	RCSB PDB , ZINC, DrugBank, PubChem	Fifty-six compounds from another paper were analyzed via pharmacophore methods and subsequqnety docked to 3 Ebola virus proteins. Total energy values on top results are given in Table 1, and binding affinity scores are given in Table 2. Certain amino acid interactions and molecular properties are given in several tables.	deslanoside, digoxin, vincristine, vinorelbine, and several unnamed ZINC compounds and investigational compounds	No	Yes	The authors explore the molecular docking of several compounds which have shown entry-blocking activity of Ebola VLPs.
Identification of Drug Lead Molecules against Ebola Virus: an In Silico Approach	Palamthodi et al., 2012, India	VP35, VP40	screening of lead molecules, docking, pharmaco-analysis	Selection of target proteins --> active site prediction --> screening of lead molecules --> molecular docking --> lipinski	PYMOL, Chimera, Arguslab, AutoDock	no PDB IDs given	371 antiviral compounds, 138 nucleic acid synthesis inhibitors, 46 reverse transcriptase inhibitors	RCSB PDB, ZINC, PubChem	After the virtual screening process with Arguslab and docking in AutoDock, 4 compounds bound to VP40 and 4 compounds bound to VP35, indicating possible inhibition.	VP35 compounds: 2-(2,3-diamino-3-oxopropyl)sulfynyl acetic acid; 5-cyclohexypyridine 2-caboxylic acid; Copper carboxymethoxyananide dihydrate; 2, 3-dihydroxy-3-[(4-methylphenyl)carbamoyl]propanoic acid. VP40 compounds: 2-(1,3-benzothiazol-2-ylsulfanyl)acetate; 2-(1,8-dihydroxy-9-oxo-10h-anthracen-2yl)acetic acid; 1-[(2s,4s,5r)-4-hydroxy-5-methyloxolan-2-yl]-5-methylpyrimidine,2,4 dione; 1-[(2r, 4…	No	No	They docked some compounds to 2 Ebola virus proteins. They don't report binding energies but show docking poses and protperties of lead compounds.
Discovery of anti-Ebola drugs: a computationaldrug repositioning case study	Kharkar et al., 2016, India	VP35	ligand-based virtual screening, molecular docking	Virtual screening of small molecule drugs in DrugBank using a VP35 crystal structure ligand --> molecular docking	ROCS OpenEye Scientific Software Suite, AutoDock	PDB ID 4IBD (ROCS and EON screening), PDB ID 4IBG (validation of docking protocol)	1135 approved/existing small-molecule drugs from DrugBank	RCSB PDB, DrugBank	Majority of the hits were an antibiotic, including from the classes: Beta-lactam, tetracycline, and quinolone. None of their top hits aligned with other reported, top anti-Ebola drugs (chloroquine, amodiaquine, clomiphene, toremiphene).	Sitaxentan, Alitretinoin, Ceftriaxone, Acitretin, Cidofovir, Telmisartan, Nateglinide, Ceftizoxime, Treprostinil, Tenoxicam	No	No
In silico analysis suggests repurposing of ibuprofen for prevention and treatment of EBOLA virus disease	Veljkovic et al., 2015, Serbia, Netherlands, Canada, USA	Surface/envelope glycoprotein	Compound virtual screening (electron-ion interaction potential / average quasi valence number), ligand optimization, molecular docking	Conduct virtual screen based on previous work (assessing the EIIP and AQVN parameters of compounds) --> molecular docking	Custom software for calculating AQVN and EIIP, VEGA ZZ, MOPAC 2009, Autodock Vina	GenBank accession number AIE11800	267 approved and 382 experimental drugs as candidates for treatment of EVD (Notable: antimalarial, antibiotics (macrolides, pleuromutilins , aminoglycosides) obtained from result of previously published work.	GenBank, CEDD	Ibuprofen	Ibuprofen	No	No
Identification of novel Ebola virus (EBOV) VP24 inhibitor from Indonesian natural products through in silico drug design approach	Tambunan et al., 2017, Indonesia	VP24	dynamics/energy minimization, ADME-TOX screening, molecular docking	Acquisition of natural product ligands from HerbalDB --> redrawn and save in mol format --> preparation of VP24 protein structure --> ADME-TOX screening of ligands --> binding site prediction --> molecular docking	Molecular Operating Environment (MOE) 2014.09, UCSF Chimera 1.9, PerkinElmer ChemBioDraw Ultra 13.0, Vega ZZ 3.0.5, OSIRIS DataWarrior 4.2.2	PDB ID: 4M0Q	2,020 Indonesian natural products from many sources, including HerbalDB database	RCSB PDB, HerbalDB	301 compounds from the ADME-TOX screen were docked to VP24. 100 of the top scoring compounds were docked again. 10 ligands had a lower binding energy than the standard BCX4430.	Cycloartocarpin, Letestuianin B, Lissoclin A, Varamine A, Lissoclibadin 4, Cystodytin J, (-)-N-Methylcoclaurine, (-)-Matairesinol, Cardamonine, Reticuline	No	No
